# Supplementary material
Source: PubMed Central journal article supplement (PMC2638573)
Supplement: ddn291_1.pdf [file ddn291_1.pdf]

## Supplemental Material

### Titles and Legends of Supplemental Material

#### Supplemental Table I

List of all the AGRE individuals and families used in the sequencing and genotyping stages. First two columns on the left list the 48 individuals and families included in stage 1 sequencing. Next two columns on the center indicate the 981 individuals (327 trios) genotyped in stage 2. Last 2 columns on the right list the 1011 individuals (337 trios) genotyped in the third stage.

#### Supplemental Table II

List of all the AGRE individuals, used in the complex indel screening. First two columns on the left list the families and the 189 autistic individuals. Next two columns on the right indicate the families and 319 unaffected siblings used as controls.

#### Supplemental Table III

SNPs used in stage 3 genotyping. The 18 tagging SNPs with a MAF=5% and higher used in stage 3 are listed. The first column on the left indicates the SNP ID. The second column denotes the SNP location in bp within the *AHI* gene (Ensembl). The third column lists the alleles and the last column on the right indicates the SNP # for the analysis. All the SNPs were selected using HapMap data NCBI 35 build for the *AHII* gene and Tagger.

Supplemental Figure 1.

Pedigree of the 87405 Complex Indel in 2 AGRE Families. Family trees of families 1 (A) & 2 (B) are shown. Indel transmission is denoted by (-) when there is no indel and (+) when heterozygous indel is found. Filled figures indicated “autism” diagnosis, patched figure denotes “broad spectrum”. Squares are males and circles females.

| First Stage (Sequencing) |             | Second Stage (Genotyping) |             | Third Stage (Genotyping) |             |
|--------------------------|-------------|---------------------------|-------------|--------------------------|-------------|
| Family Code              | Indiv. Code | Family Code               | Indiv. Code | Family Code              | Indiv. Code |
| AU0044                   | AU004403    | AU0008                    | AU000801    | AU0012                   | AU001201    |
| AU0055                   | AU005504    | AU0008                    | AU000802    | AU0012                   | AU001202    |
| AU0066                   | AU006604    | AU0008                    | AU000803    | AU0012                   | AU001203    |
| AU0107                   | AU010703    | AU0017                    | AU001701    | AU0017                   | AU001701    |
| AU0110                   | AU011004    | AU0017                    | AU001702    | AU0017                   | AU001702    |
| AU0111                   | AU011103    | AU0017                    | AU001703    | AU0017                   | AU001703    |
| AU0116                   | AU011603    | AU0018                    | AU001801    | AU0018                   | AU001801    |
| AU0120                   | AU012004    | AU0018                    | AU001802    | AU0018                   | AU001802    |
| AU0121                   | AU012103    | AU0018                    | AU001804    | AU0018                   | AU001804    |
| AU0152                   | AU015203    | AU0024                    | AU002401    | AU0021                   | AU002101    |
| AU0159                   | AU015903    | AU0024                    | AU002402    | AU0021                   | AU002102    |
| AU0175                   | AU017504    | AU0024                    | AU002403    | AU0021                   | AU002106    |
| AU0176                   | AU017604    | AU0039                    | AU0039201   | AU0022                   | AU002201    |
| AU0177                   | AU017703    | AU0039                    | AU0039202   | AU0022                   | AU002202    |
| AU0193                   | AU019303    | AU0039                    | AU0039301   | AU0022                   | AU002204    |
| AU0196                   | AU019604    | AU0045                    | AU0045201   | AU0024                   | AU002401    |
| AU0204                   | AU020403    | AU0045                    | AU0045202   | AU0024                   | AU002402    |
| AU0210                   | AU021003    | AU0045                    | AU0045301   | AU0024                   | AU002403    |
| AU0240                   | AU024004    | AU0052                    | AU0052211   | AU0027                   | AU002701    |
| AU0259                   | AU025903    | AU0052                    | AU0052212   | AU0027                   | AU002702    |
| AU0276                   | AU027605    | AU0052                    | AU0052312   | AU0027                   | AU002704    |
| AU0284                   | AU028403    | AU0097                    | AU009701    | AU0037                   | AU003701    |
| AU0306                   | AU030603    | AU0097                    | AU009702    | AU0037                   | AU003702    |
| AU0379                   | AU037906    | AU0097                    | AU009703    | AU0037                   | AU003705    |
| AU0383                   | AU038303    | AU0116                    | AU011601    | AU0043                   | AU004301    |
| AU0439                   | AU043903    | AU0116                    | AU011602    | AU0043                   | AU004302    |
| AU0450                   | AU045003    | AU0116                    | AU011604    | AU0043                   | AU004304    |
| AU0459                   | AU045903    | AU0133                    | AU013301    | AU0044                   | AU004401    |
| AU0493                   | AU049304    | AU0133                    | AU013302    | AU0044                   | AU004402    |
| AU0504                   | AU050403    | AU0133                    | AU013303    | AU0044                   | AU004403    |
| AU0538                   | AU053803    | AU0137                    | AU013701    | AU0048                   | AU004801    |
| AU0561                   | AU056104    | AU0137                    | AU013702    | AU0048                   | AU004802    |
| AU0568                   | AU056803    | AU0137                    | AU013705    | AU0048                   | AU004803    |
| AU0574                   | AU057404    | AU0146                    | AU0146201   | AU0052                   | AU0052211   |
| AU0598                   | AU059804    | AU0146                    | AU0146202   | AU0052                   | AU0052212   |
| AU0651                   | AU065104    | AU0146                    | AU0146301   | AU0052                   | AU0052312   |
| AU0660                   | AU066004    | AU0157                    | AU015701    | AU0053                   | AU005301    |
| AU0680                   | AU068004    | AU0157                    | AU015702    | AU0053                   | AU005302    |
| AU0703                   | AU070303    | AU0157                    | AU015703    | AU0053                   | AU005303    |
| AU0717                   | AU071703    | AU0161                    | AU016101    | AU0055                   | AU005501    |
| AU0730                   | AU073005    | AU0161                    | AU016102    | AU0055                   | AU005502    |
| AU0733                   | AU073303    | AU0161                    | AU016103    | AU0055                   | AU005504    |
| AU0772                   | AU077204    | AU0178                    | AU0178201   | AU0073                   | AU007301    |

|        |          |        |           |        |           |
|--------|----------|--------|-----------|--------|-----------|
| AU0791 | AU079103 | AU0178 | AU0178202 | AU0073 | AU007302  |
| AU0798 | AU079803 | AU0178 | AU0178302 | AU0073 | AU007303  |
| AU0801 | AU080103 | AU0203 | AU020301  | AU0075 | AU007501  |
| AU0814 | AU081403 | AU0203 | AU020302  | AU0075 | AU007502  |
| AU0818 | AU081803 | AU0203 | AU020305  | AU0075 | AU007503  |
|        |          | AU0212 | AU021201  | AU0076 | AU007601  |
|        |          | AU0212 | AU021202  | AU0076 | AU007602  |
|        |          | AU0212 | AU021204  | AU0076 | AU007605  |
|        |          | AU0217 | AU021701  | AU0081 | AU008101  |
|        |          | AU0217 | AU021702  | AU0081 | AU008102  |
|        |          | AU0217 | AU021704  | AU0081 | AU008103  |
|        |          | AU0231 | AU0231201 | AU0084 | AU008401  |
|        |          | AU0231 | AU0231202 | AU0084 | AU008402  |
|        |          | AU0231 | AU0231301 | AU0084 | AU008403  |
|        |          | AU0238 | AU023801  | AU0085 | AU008501  |
|        |          | AU0238 | AU023802  | AU0085 | AU008502  |
|        |          | AU0238 | AU023803  | AU0085 | AU008504  |
|        |          | AU0283 | AU028301  | AU0095 | AU009501  |
|        |          | AU0283 | AU028302  | AU0095 | AU009502  |
|        |          | AU0283 | AU028304  | AU0095 | AU009503  |
|        |          | AU0307 | AU030701  | AU0099 | AU009901  |
|        |          | AU0307 | AU030702  | AU0099 | AU009902  |
|        |          | AU0307 | AU030703  | AU0099 | AU009903  |
|        |          | AU0308 | AU030801  | AU0102 | AU010204  |
|        |          | AU0308 | AU030802  | AU0102 | AU010205  |
|        |          | AU0308 | AU030804  | AU0102 | AU010209  |
|        |          | AU0316 | AU0316201 | AU0110 | AU011001  |
|        |          | AU0316 | AU0316202 | AU0110 | AU011002  |
|        |          | AU0316 | AU0316301 | AU0110 | AU011004  |
|        |          | AU0358 | AU035803  | AU0116 | AU011601  |
|        |          | AU0358 | AU035804  | AU0116 | AU011602  |
|        |          | AU0358 | AU035810  | AU0116 | AU011604  |
|        |          | AU0385 | AU038501  | AU0120 | AU012001  |
|        |          | AU0385 | AU038502  | AU0120 | AU012002  |
|        |          | AU0385 | AU038503  | AU0120 | AU012003  |
|        |          | AU0399 | AU039901  | AU0132 | AU013201  |
|        |          | AU0399 | AU039902  | AU0132 | AU013202  |
|        |          | AU0399 | AU039903  | AU0132 | AU013203  |
|        |          | AU0436 | AU043601  | AU0140 | AU014001  |
|        |          | AU0436 | AU043602  | AU0140 | AU014002  |
|        |          | AU0436 | AU043603  | AU0140 | AU014005  |
|        |          | AU0452 | AU0452201 | AU0145 | AU014501  |
|        |          | AU0452 | AU0452202 | AU0145 | AU014502  |
|        |          | AU0452 | AU0452303 | AU0145 | AU014505  |
|        |          | AU0455 | AU045507  | AU0146 | AU0146201 |
|        |          | AU0455 | AU045508  | AU0146 | AU0146202 |

|  |  |        |           |        |           |
|--|--|--------|-----------|--------|-----------|
|  |  | AU0455 | AU045512  | AU0146 | AU0146301 |
|  |  | AU0461 | AU046101  | AU0148 | AU014801  |
|  |  | AU0461 | AU046102  | AU0148 | AU014802  |
|  |  | AU0461 | AU046103  | AU0148 | AU014803  |
|  |  | AU0481 | AU048101  | AU0149 | AU014901  |
|  |  | AU0481 | AU048102  | AU0149 | AU014902  |
|  |  | AU0481 | AU048103  | AU0149 | AU014904  |
|  |  | AU0493 | AU049301  | AU0150 | AU015001  |
|  |  | AU0493 | AU049302  | AU0150 | AU015002  |
|  |  | AU0493 | AU049303  | AU0150 | AU015004  |
|  |  | AU0509 | AU050901  | AU0161 | AU016101  |
|  |  | AU0509 | AU050902  | AU0161 | AU016102  |
|  |  | AU0509 | AU050908  | AU0161 | AU016103  |
|  |  | AU0531 | AU0531201 | AU0164 | AU016401  |
|  |  | AU0531 | AU0531202 | AU0164 | AU016402  |
|  |  | AU0531 | AU0531301 | AU0164 | AU016403  |
|  |  | AU0581 | AU058101  | AU0175 | AU017501  |
|  |  | AU0581 | AU058102  | AU0175 | AU017502  |
|  |  | AU0581 | AU058103  | AU0175 | AU017504  |
|  |  | AU0597 | AU0597201 | AU0177 | AU017701  |
|  |  | AU0597 | AU0597202 | AU0177 | AU017702  |
|  |  | AU0597 | AU0597302 | AU0177 | AU017703  |
|  |  | AU0599 | AU059901  | AU0178 | AU0178201 |
|  |  | AU0599 | AU059902  | AU0178 | AU0178202 |
|  |  | AU0599 | AU059903  | AU0178 | AU0178302 |
|  |  | AU0600 | AU060001  | AU0179 | AU017901  |
|  |  | AU0600 | AU060002  | AU0179 | AU017902  |
|  |  | AU0600 | AU060004  | AU0179 | AU017905  |
|  |  | AU0603 | AU060301  | AU0180 | AU018001  |
|  |  | AU0603 | AU060302  | AU0180 | AU018002  |
|  |  | AU0603 | AU060303  | AU0180 | AU018003  |
|  |  | AU0604 | AU060401  | AU0183 | AU018301  |
|  |  | AU0604 | AU060402  | AU0183 | AU018302  |
|  |  | AU0604 | AU060403  | AU0183 | AU018303  |
|  |  | AU0607 | AU060701  | AU0188 | AU018801  |
|  |  | AU0607 | AU060702  | AU0188 | AU018802  |
|  |  | AU0607 | AU060703  | AU0188 | AU018803  |
|  |  | AU0614 | AU061401  | AU0190 | AU019001  |
|  |  | AU0614 | AU061402  | AU0190 | AU019002  |
|  |  | AU0614 | AU061404  | AU0190 | AU019003  |
|  |  | AU0616 | AU0616201 | AU0193 | AU019301  |
|  |  | AU0616 | AU0616202 | AU0193 | AU019302  |
|  |  | AU0616 | AU0616301 | AU0193 | AU019303  |
|  |  | AU0620 | AU062001  | AU0196 | AU019601  |
|  |  | AU0620 | AU062002  | AU0196 | AU019602  |
|  |  | AU0620 | AU062003  | AU0196 | AU019604  |

|  |  |        |           |        |           |
|--|--|--------|-----------|--------|-----------|
|  |  | AU0622 | AU062201  | AU0199 | AU019901  |
|  |  | AU0622 | AU062202  | AU0199 | AU019902  |
|  |  | AU0622 | AU062203  | AU0199 | AU019904  |
|  |  | AU0625 | AU062501  | AU0200 | AU020001  |
|  |  | AU0625 | AU062502  | AU0200 | AU020002  |
|  |  | AU0625 | AU062506  | AU0200 | AU020003  |
|  |  | AU0626 | AU062601  | AU0203 | AU020301  |
|  |  | AU0626 | AU062602  | AU0203 | AU020302  |
|  |  | AU0626 | AU062603  | AU0203 | AU020305  |
|  |  | AU0627 | AU062701  | AU0207 | AU020701  |
|  |  | AU0627 | AU062702  | AU0207 | AU020702  |
|  |  | AU0627 | AU062703  | AU0207 | AU020703  |
|  |  | AU0629 | AU062901  | AU0208 | AU020801  |
|  |  | AU0629 | AU062902  | AU0208 | AU020802  |
|  |  | AU0629 | AU062905  | AU0208 | AU020803  |
|  |  | AU0630 | AU063001  | AU0210 | AU021001  |
|  |  | AU0630 | AU063002  | AU0210 | AU021002  |
|  |  | AU0630 | AU063004  | AU0210 | AU021003  |
|  |  | AU0633 | AU063301  | AU0212 | AU021201  |
|  |  | AU0633 | AU063302  | AU0212 | AU021202  |
|  |  | AU0633 | AU063303  | AU0212 | AU021204  |
|  |  | AU0640 | AU064001  | AU0215 | AU021501  |
|  |  | AU0640 | AU064002  | AU0215 | AU021502  |
|  |  | AU0640 | AU064004  | AU0215 | AU021503  |
|  |  | AU0653 | AU065301  | AU0217 | AU021701  |
|  |  | AU0653 | AU065302  | AU0217 | AU021702  |
|  |  | AU0653 | AU065304  | AU0217 | AU021704  |
|  |  | AU0654 | AU065401  | AU0222 | AU022201  |
|  |  | AU0654 | AU065402  | AU0222 | AU022202  |
|  |  | AU0654 | AU065404  | AU0222 | AU022203  |
|  |  | AU0658 | AU065801  | AU0227 | AU022701  |
|  |  | AU0658 | AU065802  | AU0227 | AU022702  |
|  |  | AU0658 | AU065807  | AU0227 | AU022704  |
|  |  | AU0661 | AU066101  | AU0228 | AU022801  |
|  |  | AU0661 | AU066102  | AU0228 | AU022802  |
|  |  | AU0661 | AU066103  | AU0228 | AU022804  |
|  |  | AU0662 | AU066201  | AU0230 | AU023001  |
|  |  | AU0662 | AU066202  | AU0230 | AU023002  |
|  |  | AU0662 | AU066204  | AU0230 | AU023005  |
|  |  | AU0674 | AU067401  | AU0231 | AU0231201 |
|  |  | AU0674 | AU067402  | AU0231 | AU0231202 |
|  |  | AU0674 | AU067404  | AU0231 | AU0231301 |
|  |  | AU0675 | AU0675201 | AU0238 | AU023801  |
|  |  | AU0675 | AU0675202 | AU0238 | AU023802  |
|  |  | AU0675 | AU0675301 | AU0238 | AU023803  |
|  |  | AU0677 | AU067701  | AU0240 | AU024001  |

|  |  |        |           |        |          |
|--|--|--------|-----------|--------|----------|
|  |  | AU0677 | AU067702  | AU0240 | AU024002 |
|  |  | AU0677 | AU067703  | AU0240 | AU024003 |
|  |  | AU0679 | AU067901  | AU0241 | AU024101 |
|  |  | AU0679 | AU067902  | AU0241 | AU024102 |
|  |  | AU0679 | AU067903  | AU0241 | AU024104 |
|  |  | AU0680 | AU068001  | AU0242 | AU024201 |
|  |  | AU0680 | AU068002  | AU0242 | AU024202 |
|  |  | AU0680 | AU068004  | AU0242 | AU024204 |
|  |  | AU0682 | AU068201  | AU0247 | AU024701 |
|  |  | AU0682 | AU068202  | AU0247 | AU024702 |
|  |  | AU0682 | AU068203  | AU0247 | AU024703 |
|  |  | AU0683 | AU068301  | AU0250 | AU025001 |
|  |  | AU0683 | AU068302  | AU0250 | AU025002 |
|  |  | AU0683 | AU068304  | AU0250 | AU025005 |
|  |  | AU0684 | AU068401  | AU0254 | AU025401 |
|  |  | AU0684 | AU068402  | AU0254 | AU025402 |
|  |  | AU0684 | AU068406  | AU0254 | AU025403 |
|  |  | AU0686 | AU068601  | AU0258 | AU025801 |
|  |  | AU0686 | AU068602  | AU0258 | AU025802 |
|  |  | AU0686 | AU068606  | AU0258 | AU025803 |
|  |  | AU0688 | AU068801  | AU0259 | AU025901 |
|  |  | AU0688 | AU068802  | AU0259 | AU025902 |
|  |  | AU0688 | AU068803  | AU0259 | AU025903 |
|  |  | AU0689 | AU068901  | AU0265 | AU026501 |
|  |  | AU0689 | AU068902  | AU0265 | AU026502 |
|  |  | AU0689 | AU068903  | AU0265 | AU026503 |
|  |  | AU0698 | AU069803  | AU0273 | AU027301 |
|  |  | AU0698 | AU069804  | AU0273 | AU027302 |
|  |  | AU0698 | AU069807  | AU0273 | AU027304 |
|  |  | AU0700 | AU070001  | AU0275 | AU027501 |
|  |  | AU0700 | AU070002  | AU0275 | AU027502 |
|  |  | AU0700 | AU070003  | AU0275 | AU027505 |
|  |  | AU0701 | AU0701202 | AU0283 | AU028301 |
|  |  | AU0701 | AU0701203 | AU0283 | AU028302 |
|  |  | AU0701 | AU0701302 | AU0283 | AU028304 |
|  |  | AU0705 | AU070501  | AU0284 | AU028401 |
|  |  | AU0705 | AU070502  | AU0284 | AU028402 |
|  |  | AU0705 | AU070503  | AU0284 | AU028403 |
|  |  | AU0708 | AU070803  | AU0287 | AU028701 |
|  |  | AU0708 | AU070804  | AU0287 | AU028702 |
|  |  | AU0708 | AU070808  | AU0287 | AU028703 |
|  |  | AU0709 | AU070903  | AU0289 | AU028901 |
|  |  | AU0709 | AU070904  | AU0289 | AU028902 |
|  |  | AU0709 | AU070908  | AU0289 | AU028903 |
|  |  | AU0712 | AU071201  | AU0293 | AU029301 |
|  |  | AU0712 | AU071202  | AU0293 | AU029302 |

|  |  |        |           |        |          |
|--|--|--------|-----------|--------|----------|
|  |  | AU0712 | AU071203  | AU0293 | AU029303 |
|  |  | AU0714 | AU0714201 | AU0298 | AU029801 |
|  |  | AU0714 | AU0714202 | AU0298 | AU029802 |
|  |  | AU0714 | AU0714301 | AU0298 | AU029804 |
|  |  | AU0718 | AU071801  | AU0301 | AU030101 |
|  |  | AU0718 | AU071802  | AU0301 | AU030102 |
|  |  | AU0718 | AU071803  | AU0301 | AU030103 |
|  |  | AU0720 | AU072001  | AU0305 | AU030501 |
|  |  | AU0720 | AU072002  | AU0305 | AU030502 |
|  |  | AU0720 | AU072004  | AU0305 | AU030504 |
|  |  | AU0722 | AU072201  | AU0306 | AU030601 |
|  |  | AU0722 | AU072202  | AU0306 | AU030602 |
|  |  | AU0722 | AU072203  | AU0306 | AU030603 |
|  |  | AU0736 | AU073601  | AU0308 | AU030801 |
|  |  | AU0736 | AU073602  | AU0308 | AU030802 |
|  |  | AU0736 | AU073603  | AU0308 | AU030804 |
|  |  | AU0744 | AU074401  | AU0311 | AU031101 |
|  |  | AU0744 | AU074402  | AU0311 | AU031102 |
|  |  | AU0744 | AU074403  | AU0311 | AU031104 |
|  |  | AU0745 | AU074501  | AU0325 | AU032501 |
|  |  | AU0745 | AU074502  | AU0325 | AU032502 |
|  |  | AU0745 | AU074503  | AU0325 | AU032504 |
|  |  | AU0746 | AU074601  | AU0327 | AU032701 |
|  |  | AU0746 | AU074602  | AU0327 | AU032702 |
|  |  | AU0746 | AU074604  | AU0327 | AU032704 |
|  |  | AU0752 | AU075205  | AU0328 | AU032801 |
|  |  | AU0752 | AU075206  | AU0328 | AU032802 |
|  |  | AU0752 | AU075210  | AU0328 | AU032804 |
|  |  | AU0755 | AU075501  | AU0334 | AU033401 |
|  |  | AU0755 | AU075502  | AU0334 | AU033402 |
|  |  | AU0755 | AU075503  | AU0334 | AU033403 |
|  |  | AU0756 | AU075601  | AU0336 | AU033601 |
|  |  | AU0756 | AU075602  | AU0336 | AU033602 |
|  |  | AU0756 | AU075603  | AU0336 | AU033604 |
|  |  | AU0758 | AU075801  | AU0349 | AU034901 |
|  |  | AU0758 | AU075802  | AU0349 | AU034902 |
|  |  | AU0758 | AU075803  | AU0349 | AU034903 |
|  |  | AU0763 | AU076301  | AU0361 | AU036101 |
|  |  | AU0763 | AU076302  | AU0361 | AU036102 |
|  |  | AU0763 | AU076303  | AU0361 | AU036103 |
|  |  | AU0767 | AU076701  | AU0370 | AU037001 |
|  |  | AU0767 | AU076702  | AU0370 | AU037002 |
|  |  | AU0767 | AU076704  | AU0370 | AU037003 |
|  |  | AU0768 | AU076803  | AU0371 | AU037101 |
|  |  | AU0768 | AU076805  | AU0371 | AU037102 |
|  |  | AU0768 | AU076808  | AU0371 | AU037103 |



|  |  |        |           |        |           |
|--|--|--------|-----------|--------|-----------|
|  |  | AU0771 | AU077101  | AU0380 | AU038001  |
|  |  | AU0771 | AU077102  | AU0380 | AU038002  |
|  |  | AU0771 | AU077105  | AU0380 | AU038004  |
|  |  | AU0772 | AU077201  | AU0383 | AU038301  |
|  |  | AU0772 | AU077202  | AU0383 | AU038302  |
|  |  | AU0772 | AU077205  | AU0383 | AU038303  |
|  |  | AU0773 | AU077301  | AU0386 | AU038601  |
|  |  | AU0773 | AU077302  | AU0386 | AU038602  |
|  |  | AU0773 | AU077303  | AU0386 | AU038603  |
|  |  | AU0777 | AU077701  | AU0388 | AU038801  |
|  |  | AU0777 | AU077702  | AU0388 | AU038802  |
|  |  | AU0777 | AU077704  | AU0388 | AU038804  |
|  |  | AU0780 | AU0780201 | AU0399 | AU039901  |
|  |  | AU0780 | AU0780202 | AU0399 | AU039902  |
|  |  | AU0780 | AU0780301 | AU0399 | AU039903  |
|  |  | AU0781 | AU078101  | AU0419 | AU041901  |
|  |  | AU0781 | AU078102  | AU0419 | AU041902  |
|  |  | AU0781 | AU078104  | AU0419 | AU041904  |
|  |  | AU0782 | AU0782201 | AU0423 | AU042301  |
|  |  | AU0782 | AU0782202 | AU0423 | AU042302  |
|  |  | AU0782 | AU0782301 | AU0423 | AU042303  |
|  |  | AU0786 | AU0786201 | AU0427 | AU042701  |
|  |  | AU0786 | AU0786202 | AU0427 | AU042702  |
|  |  | AU0786 | AU0786303 | AU0427 | AU042704  |
|  |  | AU0788 | AU078801  | AU0432 | AU043201  |
|  |  | AU0788 | AU078802  | AU0432 | AU043202  |
|  |  | AU0788 | AU078804  | AU0432 | AU043205  |
|  |  | AU0792 | AU079201  | AU0436 | AU043601  |
|  |  | AU0792 | AU079202  | AU0436 | AU043602  |
|  |  | AU0792 | AU079204  | AU0436 | AU043603  |
|  |  | AU0803 | AU0803201 | AU0438 | AU043801  |
|  |  | AU0803 | AU0803202 | AU0438 | AU043802  |
|  |  | AU0803 | AU0803301 | AU0438 | AU043803  |
|  |  | AU0806 | AU0806201 | AU0452 | AU0452201 |
|  |  | AU0806 | AU0806202 | AU0452 | AU0452202 |
|  |  | AU0806 | AU0806301 | AU0452 | AU0452303 |
|  |  | AU0811 | AU081101  | AU0461 | AU046101  |
|  |  | AU0811 | AU081102  | AU0461 | AU046102  |
|  |  | AU0811 | AU081103  | AU0461 | AU046103  |
|  |  | AU0821 | AU082101  | AU0465 | AU046501  |
|  |  | AU0821 | AU082102  | AU0465 | AU046502  |
|  |  | AU0821 | AU082104  | AU0465 | AU046503  |
|  |  | AU0822 | AU082201  | AU0479 | AU047901  |
|  |  | AU0822 | AU082202  | AU0479 | AU047902  |
|  |  | AU0822 | AU082203  | AU0479 | AU047903  |
|  |  | AU0823 | AU082301  | AU0482 | AU048201  |

|  |  |        |           |        |          |
|--|--|--------|-----------|--------|----------|
|  |  | AU0823 | AU082302  | AU0482 | AU048202 |
|  |  | AU0823 | AU082303  | AU0482 | AU048204 |
|  |  | AU0831 | AU083101  | AU0489 | AU048901 |
|  |  | AU0831 | AU083102  | AU0489 | AU048902 |
|  |  | AU0831 | AU083103  | AU0489 | AU048903 |
|  |  | AU0833 | AU0833201 | AU0493 | AU049301 |
|  |  | AU0833 | AU0833202 | AU0493 | AU049302 |
|  |  | AU0833 | AU0833301 | AU0493 | AU049303 |
|  |  | AU0835 | AU083501  | AU0501 | AU050101 |
|  |  | AU0835 | AU083502  | AU0501 | AU050102 |
|  |  | AU0835 | AU083503  | AU0501 | AU050103 |
|  |  | AU0836 | AU083601  | AU0504 | AU050401 |
|  |  | AU0836 | AU083602  | AU0504 | AU050402 |
|  |  | AU0836 | AU083603  | AU0504 | AU050403 |
|  |  | AU0839 | AU0839201 | AU0509 | AU050901 |
|  |  | AU0839 | AU0839202 | AU0509 | AU050902 |
|  |  | AU0839 | AU0839301 | AU0509 | AU050908 |
|  |  | AU0841 | AU084101  | AU0521 | AU052101 |
|  |  | AU0841 | AU084102  | AU0521 | AU052102 |
|  |  | AU0841 | AU084104  | AU0521 | AU052103 |
|  |  | AU0842 | AU084201  | AU0533 | AU053301 |
|  |  | AU0842 | AU084202  | AU0533 | AU053302 |
|  |  | AU0842 | AU084203  | AU0533 | AU053303 |
|  |  | AU0845 | AU084501  | AU0535 | AU053501 |
|  |  | AU0845 | AU084502  | AU0535 | AU053502 |
|  |  | AU0845 | AU084503  | AU0535 | AU053503 |
|  |  | AU0852 | AU0852201 | AU0538 | AU053801 |
|  |  | AU0852 | AU0852202 | AU0538 | AU053802 |
|  |  | AU0852 | AU0852303 | AU0538 | AU053803 |
|  |  | AU0862 | AU0862201 | AU0541 | AU054101 |
|  |  | AU0862 | AU0862202 | AU0541 | AU054102 |
|  |  | AU0862 | AU0862302 | AU0541 | AU054103 |
|  |  | AU0863 | AU0863201 | AU0542 | AU054201 |
|  |  | AU0863 | AU0863202 | AU0542 | AU054202 |
|  |  | AU0863 | AU0863301 | AU0542 | AU054203 |
|  |  | AU0866 | AU0866201 | AU0543 | AU054301 |
|  |  | AU0866 | AU0866202 | AU0543 | AU054302 |
|  |  | AU0866 | AU0866301 | AU0543 | AU054303 |
|  |  | AU0868 | AU086801  | AU0545 | AU054501 |
|  |  | AU0868 | AU086802  | AU0545 | AU054502 |
|  |  | AU0868 | AU086804  | AU0545 | AU054503 |
|  |  | AU0871 | AU0871201 | AU0550 | AU055001 |
|  |  | AU0871 | AU0871202 | AU0550 | AU055002 |
|  |  | AU0871 | AU0871302 | AU0550 | AU055005 |
|  |  | AU0875 | AU0875201 | AU0551 | AU055101 |
|  |  | AU0875 | AU0875202 | AU0551 | AU055102 |

|  |  |        |           |        |           |
|--|--|--------|-----------|--------|-----------|
|  |  | AU0875 | AU0875301 | AU0551 | AU055104  |
|  |  | AU0881 | AU0881201 | AU0553 | AU055301  |
|  |  | AU0881 | AU0881202 | AU0553 | AU055302  |
|  |  | AU0881 | AU0881301 | AU0553 | AU055303  |
|  |  | AU0885 | AU0885201 | AU0555 | AU055501  |
|  |  | AU0885 | AU0885202 | AU0555 | AU055502  |
|  |  | AU0885 | AU0885303 | AU0555 | AU055503  |
|  |  | AU0895 | AU0895201 | AU0561 | AU056101  |
|  |  | AU0895 | AU0895202 | AU0561 | AU056102  |
|  |  | AU0895 | AU0895303 | AU0561 | AU056103  |
|  |  | AU0899 | AU089901  | AU0565 | AU056501  |
|  |  | AU0899 | AU089902  | AU0565 | AU056502  |
|  |  | AU0899 | AU089903  | AU0565 | AU056503  |
|  |  | AU0901 | AU0901201 | AU0566 | AU056601  |
|  |  | AU0901 | AU0901202 | AU0566 | AU056602  |
|  |  | AU0901 | AU0901302 | AU0566 | AU056603  |
|  |  | AU0903 | AU0903201 | AU0568 | AU056801  |
|  |  | AU0903 | AU0903202 | AU0568 | AU056802  |
|  |  | AU0903 | AU0903301 | AU0568 | AU056803  |
|  |  | AU0905 | AU0905201 | AU0579 | AU057901  |
|  |  | AU0905 | AU0905202 | AU0579 | AU057902  |
|  |  | AU0905 | AU0905301 | AU0579 | AU057904  |
|  |  | AU0906 | AU0906201 | AU0580 | AU058001  |
|  |  | AU0906 | AU0906202 | AU0580 | AU058002  |
|  |  | AU0906 | AU0906302 | AU0580 | AU058003  |
|  |  | AU0907 | AU0907201 | AU0581 | AU058101  |
|  |  | AU0907 | AU0907202 | AU0581 | AU058102  |
|  |  | AU0907 | AU0907301 | AU0581 | AU058103  |
|  |  | AU0911 | AU0911201 | AU0583 | AU058301  |
|  |  | AU0911 | AU0911202 | AU0583 | AU058302  |
|  |  | AU0911 | AU0911301 | AU0583 | AU058303  |
|  |  | AU0915 | AU0915201 | AU0585 | AU058501  |
|  |  | AU0915 | AU0915202 | AU0585 | AU058502  |
|  |  | AU0915 | AU0915301 | AU0585 | AU058503  |
|  |  | AU0916 | AU0916201 | AU0593 | AU059301  |
|  |  | AU0916 | AU0916202 | AU0593 | AU059302  |
|  |  | AU0916 | AU0916301 | AU0593 | AU059304  |
|  |  | AU0917 | AU0917201 | AU0597 | AU0597201 |
|  |  | AU0917 | AU0917202 | AU0597 | AU0597202 |
|  |  | AU0917 | AU0917301 | AU0597 | AU0597302 |
|  |  | AU0918 | AU0918201 | AU0598 | AU059801  |
|  |  | AU0918 | AU0918202 | AU0598 | AU059802  |
|  |  | AU0918 | AU0918301 | AU0598 | AU059803  |
|  |  | AU0920 | AU0920201 | AU0599 | AU059901  |
|  |  | AU0920 | AU0920202 | AU0599 | AU059902  |
|  |  | AU0920 | AU0920301 | AU0599 | AU059903  |

|  |  |        |           |        |           |
|--|--|--------|-----------|--------|-----------|
|  |  | AU0922 | AU0922201 | AU0600 | AU060001  |
|  |  | AU0922 | AU0922202 | AU0600 | AU060002  |
|  |  | AU0922 | AU0922301 | AU0600 | AU060004  |
|  |  | AU0923 | AU0923201 | AU0603 | AU060301  |
|  |  | AU0923 | AU0923202 | AU0603 | AU060302  |
|  |  | AU0923 | AU0923301 | AU0603 | AU060303  |
|  |  | AU0924 | AU0924201 | AU0611 | AU061101  |
|  |  | AU0924 | AU0924202 | AU0611 | AU061102  |
|  |  | AU0924 | AU0924301 | AU0611 | AU061103  |
|  |  | AU0928 | AU0928201 | AU0614 | AU061401  |
|  |  | AU0928 | AU0928202 | AU0614 | AU061402  |
|  |  | AU0928 | AU0928301 | AU0614 | AU061404  |
|  |  | AU0931 | AU0931201 | AU0616 | AU0616201 |
|  |  | AU0931 | AU0931202 | AU0616 | AU0616202 |
|  |  | AU0931 | AU0931306 | AU0616 | AU0616301 |
|  |  | AU0933 | AU0933201 | AU0618 | AU061801  |
|  |  | AU0933 | AU0933202 | AU0618 | AU061802  |
|  |  | AU0933 | AU0933301 | AU0618 | AU061805  |
|  |  | AU0934 | AU0934201 | AU0620 | AU062001  |
|  |  | AU0934 | AU0934202 | AU0620 | AU062002  |
|  |  | AU0934 | AU0934301 | AU0620 | AU062004  |
|  |  | AU0938 | AU0938201 | AU0622 | AU062201  |
|  |  | AU0938 | AU0938202 | AU0622 | AU062202  |
|  |  | AU0938 | AU0938301 | AU0622 | AU062203  |
|  |  | AU0939 | AU0939201 | AU0626 | AU062601  |
|  |  | AU0939 | AU0939202 | AU0626 | AU062602  |
|  |  | AU0939 | AU0939303 | AU0626 | AU062603  |
|  |  | AU0941 | AU0941201 | AU0629 | AU062901  |
|  |  | AU0941 | AU0941202 | AU0629 | AU062902  |
|  |  | AU0941 | AU0941301 | AU0629 | AU062905  |
|  |  | AU0943 | AU0943201 | AU0633 | AU063301  |
|  |  | AU0943 | AU0943202 | AU0633 | AU063302  |
|  |  | AU0943 | AU0943301 | AU0633 | AU063303  |
|  |  | AU0947 | AU0947201 | AU0641 | AU064101  |
|  |  | AU0947 | AU0947202 | AU0641 | AU064102  |
|  |  | AU0947 | AU0947302 | AU0641 | AU064104  |
|  |  | AU0948 | AU0948201 | AU0651 | AU065101  |
|  |  | AU0948 | AU0948202 | AU0651 | AU065102  |
|  |  | AU0948 | AU0948301 | AU0651 | AU065104  |
|  |  | AU0951 | AU0951201 | AU0654 | AU065401  |
|  |  | AU0951 | AU0951202 | AU0654 | AU065402  |
|  |  | AU0951 | AU0951301 | AU0654 | AU065404  |
|  |  | AU0952 | AU0952201 | AU0661 | AU066101  |
|  |  | AU0952 | AU0952202 | AU0661 | AU066102  |
|  |  | AU0952 | AU0952302 | AU0661 | AU066103  |
|  |  | AU0953 | AU0953201 | AU0664 | AU066401  |

|  |  |        |           |        |           |
|--|--|--------|-----------|--------|-----------|
|  |  | AU0953 | AU0953202 | AU0664 | AU066402  |
|  |  | AU0953 | AU0953301 | AU0664 | AU066403  |
|  |  | AU0955 | AU0955201 | AU0668 | AU066815  |
|  |  | AU0955 | AU0955202 | AU0668 | AU066816  |
|  |  | AU0955 | AU0955301 | AU0668 | AU066820  |
|  |  | AU0959 | AU0959201 | AU0674 | AU067401  |
|  |  | AU0959 | AU0959202 | AU0674 | AU067402  |
|  |  | AU0959 | AU0959302 | AU0674 | AU067404  |
|  |  | AU0962 | AU0962201 | AU0675 | AU0675201 |
|  |  | AU0962 | AU0962202 | AU0675 | AU0675202 |
|  |  | AU0962 | AU0962301 | AU0675 | AU0675301 |
|  |  | AU0965 | AU0965201 | AU0677 | AU067701  |
|  |  | AU0965 | AU0965202 | AU0677 | AU067702  |
|  |  | AU0965 | AU0965301 | AU0677 | AU067703  |
|  |  | AU0971 | AU0971201 | AU0688 | AU068801  |
|  |  | AU0971 | AU0971202 | AU0688 | AU068802  |
|  |  | AU0971 | AU0971301 | AU0688 | AU068803  |
|  |  | AU0972 | AU0972201 | AU0696 | AU069601  |
|  |  | AU0972 | AU0972202 | AU0696 | AU069602  |
|  |  | AU0972 | AU0972301 | AU0696 | AU069603  |
|  |  | AU0973 | AU0973201 | AU0698 | AU069803  |
|  |  | AU0973 | AU0973202 | AU0698 | AU069804  |
|  |  | AU0973 | AU0973301 | AU0698 | AU069807  |
|  |  | AU0974 | AU0974201 | AU0701 | AU0701202 |
|  |  | AU0974 | AU0974202 | AU0701 | AU0701203 |
|  |  | AU0974 | AU0974301 | AU0701 | AU0701302 |
|  |  | AU0979 | AU0979201 | AU0703 | AU070301  |
|  |  | AU0979 | AU0979202 | AU0703 | AU070302  |
|  |  | AU0979 | AU0979301 | AU0703 | AU070303  |
|  |  | AU0980 | AU0980201 | AU0705 | AU070501  |
|  |  | AU0980 | AU0980202 | AU0705 | AU070502  |
|  |  | AU0980 | AU0980302 | AU0705 | AU070503  |
|  |  | AU0981 | AU0981201 | AU0707 | AU070701  |
|  |  | AU0981 | AU0981202 | AU0707 | AU070702  |
|  |  | AU0981 | AU0981301 | AU0707 | AU070705  |
|  |  | AU0993 | AU0993201 | AU0708 | AU070803  |
|  |  | AU0993 | AU0993202 | AU0708 | AU070804  |
|  |  | AU0993 | AU0993301 | AU0708 | AU070808  |
|  |  | AU0994 | AU0994201 | AU0712 | AU071201  |
|  |  | AU0994 | AU0994202 | AU0712 | AU071202  |
|  |  | AU0994 | AU0994301 | AU0712 | AU071203  |
|  |  | AU0995 | AU0995201 | AU0714 | AU0714201 |
|  |  | AU0995 | AU0995202 | AU0714 | AU0714202 |
|  |  | AU0995 | AU0995301 | AU0714 | AU0714301 |
|  |  | AU0997 | AU0997201 | AU0730 | AU073001  |
|  |  | AU0997 | AU0997202 | AU0730 | AU073002  |

|  |  |        |           |        |           |
|--|--|--------|-----------|--------|-----------|
|  |  | AU0997 | AU0997301 | AU0730 | AU073003  |
|  |  | AU1000 | AU1000201 | AU0736 | AU073601  |
|  |  | AU1000 | AU1000202 | AU0736 | AU073602  |
|  |  | AU1000 | AU1000303 | AU0736 | AU073603  |
|  |  | AU1001 | AU1001101 | AU0737 | AU073701  |
|  |  | AU1001 | AU1001102 | AU0737 | AU073702  |
|  |  | AU1001 | AU1001201 | AU0737 | AU073703  |
|  |  | AU1002 | AU1002101 | AU0745 | AU074501  |
|  |  | AU1002 | AU1002102 | AU0745 | AU074502  |
|  |  | AU1002 | AU1002201 | AU0745 | AU074503  |
|  |  | AU1005 | AU1005201 | AU0755 | AU075501  |
|  |  | AU1005 | AU1005202 | AU0755 | AU075502  |
|  |  | AU1005 | AU1005301 | AU0755 | AU075503  |
|  |  | AU1006 | AU1006201 | AU0758 | AU075801  |
|  |  | AU1006 | AU1006202 | AU0758 | AU075802  |
|  |  | AU1006 | AU1006301 | AU0758 | AU075803  |
|  |  | AU1007 | AU1007201 | AU0771 | AU077101  |
|  |  | AU1007 | AU1007202 | AU0771 | AU077102  |
|  |  | AU1007 | AU1007302 | AU0771 | AU077105  |
|  |  | AU1009 | AU1009201 | AU0773 | AU077301  |
|  |  | AU1009 | AU1009202 | AU0773 | AU077302  |
|  |  | AU1009 | AU1009301 | AU0773 | AU077303  |
|  |  | AU1010 | AU1010201 | AU0780 | AU0780201 |
|  |  | AU1010 | AU1010202 | AU0780 | AU0780202 |
|  |  | AU1010 | AU1010301 | AU0780 | AU0780301 |
|  |  | AU1016 | AU1016201 | AU0781 | AU078101  |
|  |  | AU1016 | AU1016202 | AU0781 | AU078102  |
|  |  | AU1016 | AU1016302 | AU0781 | AU078104  |
|  |  | AU1030 | AU1030201 | AU0782 | AU0782201 |
|  |  | AU1030 | AU1030202 | AU0782 | AU0782202 |
|  |  | AU1030 | AU1030302 | AU0782 | AU0782301 |
|  |  | AU1033 | AU1033201 | AU0783 | AU078301  |
|  |  | AU1033 | AU1033202 | AU0783 | AU078302  |
|  |  | AU1033 | AU1033301 | AU0783 | AU078304  |
|  |  | AU1038 | AU1038201 | AU0788 | AU078801  |
|  |  | AU1038 | AU1038202 | AU0788 | AU078802  |
|  |  | AU1038 | AU1038301 | AU0788 | AU078804  |
|  |  | AU1039 | AU1039201 | AU0791 | AU079101  |
|  |  | AU1039 | AU1039202 | AU0791 | AU079102  |
|  |  | AU1039 | AU1039302 | AU0791 | AU079103  |
|  |  | AU1043 | AU1043201 | AU0792 | AU079201  |
|  |  | AU1043 | AU1043202 | AU0792 | AU079202  |
|  |  | AU1043 | AU1043301 | AU0792 | AU079204  |
|  |  | AU1047 | AU1047201 | AU0793 | AU079301  |
|  |  | AU1047 | AU1047202 | AU0793 | AU079302  |
|  |  | AU1047 | AU1047301 | AU0793 | AU079303  |

|  |  |        |           |        |           |
|--|--|--------|-----------|--------|-----------|
|  |  | AU1048 | AU1048201 | AU0796 | AU079601  |
|  |  | AU1048 | AU1048202 | AU0796 | AU079602  |
|  |  | AU1048 | AU1048301 | AU0796 | AU079603  |
|  |  | AU1054 | AU1054201 | AU0796 | AU079604  |
|  |  | AU1054 | AU1054202 | AU0796 | AU079605  |
|  |  | AU1054 | AU1054301 | AU0799 | AU079901  |
|  |  | AU1059 | AU1059201 | AU0799 | AU079902  |
|  |  | AU1059 | AU1059202 | AU0799 | AU079904  |
|  |  | AU1059 | AU1059302 | AU0802 | AU080201  |
|  |  | AU1060 | AU1060201 | AU0802 | AU080202  |
|  |  | AU1060 | AU1060202 | AU0802 | AU080203  |
|  |  | AU1060 | AU1060301 | AU0804 | AU080401  |
|  |  | AU1069 | AU1069201 | AU0804 | AU080402  |
|  |  | AU1069 | AU1069202 | AU0804 | AU080404  |
|  |  | AU1069 | AU1069301 | AU0806 | AU0806201 |
|  |  | AU1074 | AU1074201 | AU0806 | AU0806202 |
|  |  | AU1074 | AU1074202 | AU0806 | AU0806301 |
|  |  | AU1074 | AU1074301 | AU0808 | AU080801  |
|  |  | AU1075 | AU1075201 | AU0808 | AU080802  |
|  |  | AU1075 | AU1075202 | AU0808 | AU080803  |
|  |  | AU1075 | AU1075301 | AU0815 | AU081501  |
|  |  | AU1076 | AU1076201 | AU0815 | AU081502  |
|  |  | AU1076 | AU1076202 | AU0815 | AU081503  |
|  |  | AU1076 | AU1076303 | AU0818 | AU081801  |
|  |  | AU1078 | AU1078201 | AU0818 | AU081802  |
|  |  | AU1078 | AU1078202 | AU0818 | AU081803  |
|  |  | AU1078 | AU1078301 | AU0825 | AU082501  |
|  |  | AU1081 | AU1081201 | AU0825 | AU082502  |
|  |  | AU1081 | AU1081202 | AU0825 | AU082505  |
|  |  | AU1081 | AU1081301 | AU0828 | AU082801  |
|  |  | AU1083 | AU1083201 | AU0828 | AU082802  |
|  |  | AU1083 | AU1083202 | AU0828 | AU082803  |
|  |  | AU1083 | AU1083301 | AU0835 | AU083501  |
|  |  | AU1086 | AU1086201 | AU0835 | AU083502  |
|  |  | AU1086 | AU1086202 | AU0835 | AU083503  |
|  |  | AU1086 | AU1086302 | AU0841 | AU084101  |
|  |  | AU1087 | AU1087201 | AU0841 | AU084102  |
|  |  | AU1087 | AU1087202 | AU0841 | AU084104  |
|  |  | AU1087 | AU1087301 | AU0852 | AU0852201 |
|  |  | AU1089 | AU1089201 | AU0852 | AU0852202 |
|  |  | AU1089 | AU1089202 | AU0852 | AU0852303 |
|  |  | AU1089 | AU1089302 | AU0863 | AU0863201 |
|  |  | AU1091 | AU1091201 | AU0863 | AU0863202 |
|  |  | AU1091 | AU1091202 | AU0863 | AU0863301 |
|  |  | AU1091 | AU1091304 | AU0868 | AU086801  |
|  |  | AU1092 | AU1092201 | AU0868 | AU086802  |

|  |  |        |           |        |           |
|--|--|--------|-----------|--------|-----------|
|  |  | AU1092 | AU1092202 | AU0868 | AU086804  |
|  |  | AU1092 | AU1092301 | AU0875 | AU0875201 |
|  |  | AU1094 | AU1094201 | AU0875 | AU0875202 |
|  |  | AU1094 | AU1094202 | AU0875 | AU0875301 |
|  |  | AU1094 | AU1094301 | AU0881 | AU0881201 |
|  |  | AU1097 | AU1097201 | AU0881 | AU0881202 |
|  |  | AU1097 | AU1097202 | AU0881 | AU0881301 |
|  |  | AU1097 | AU1097301 | AU0885 | AU0885201 |
|  |  | AU1098 | AU1098201 | AU0885 | AU0885202 |
|  |  | AU1098 | AU1098202 | AU0885 | AU0885303 |
|  |  | AU1098 | AU1098302 | AU0895 | AU0895201 |
|  |  | AU1099 | AU1099201 | AU0895 | AU0895202 |
|  |  | AU1099 | AU1099202 | AU0895 | AU0895303 |
|  |  | AU1099 | AU1099302 | AU0899 | AU089901  |
|  |  | AU1102 | AU1102201 | AU0899 | AU089902  |
|  |  | AU1102 | AU1102202 | AU0899 | AU089903  |
|  |  | AU1102 | AU1102302 | AU0901 | AU0901201 |
|  |  | AU1105 | AU1105201 | AU0901 | AU0901202 |
|  |  | AU1105 | AU1105202 | AU0901 | AU0901302 |
|  |  | AU1105 | AU1105303 | AU0903 | AU0903201 |
|  |  | AU1107 | AU1107201 | AU0903 | AU0903202 |
|  |  | AU1107 | AU1107202 | AU0903 | AU0903301 |
|  |  | AU1107 | AU1107301 | AU0911 | AU0911201 |
|  |  | AU1134 | AU1134201 | AU0911 | AU0911202 |
|  |  | AU1134 | AU1134202 | AU0911 | AU0911301 |
|  |  | AU1134 | AU1134301 | AU0917 | AU0917201 |
|  |  | AU1135 | AU1135101 | AU0917 | AU0917202 |
|  |  | AU1135 | AU1135102 | AU0917 | AU0917301 |
|  |  | AU1135 | AU1135202 | AU0920 | AU0920201 |
|  |  | AU1141 | AU1141101 | AU0920 | AU0920202 |
|  |  | AU1141 | AU1141102 | AU0920 | AU0920301 |
|  |  | AU1141 | AU1141202 | AU0924 | AU0924201 |
|  |  | AU1145 | AU1145201 | AU0924 | AU0924202 |
|  |  | AU1145 | AU1145202 | AU0924 | AU0924301 |
|  |  | AU1145 | AU1145301 | AU0928 | AU0928201 |
|  |  | AU1147 | AU1147201 | AU0928 | AU0928202 |
|  |  | AU1147 | AU1147202 | AU0928 | AU0928301 |
|  |  | AU1147 | AU1147301 | AU0931 | AU0931201 |
|  |  | AU1157 | AU1157201 | AU0931 | AU0931202 |
|  |  | AU1157 | AU1157202 | AU0931 | AU0931306 |
|  |  | AU1157 | AU1157301 | AU0933 | AU0933201 |
|  |  | AU1158 | AU1158201 | AU0933 | AU0933202 |
|  |  | AU1158 | AU1158202 | AU0933 | AU0933301 |
|  |  | AU1158 | AU1158301 | AU0934 | AU0934201 |
|  |  | AU1159 | AU1159201 | AU0934 | AU0934202 |
|  |  | AU1159 | AU1159202 | AU0934 | AU0934301 |



|  |  |        |           |        |           |
|--|--|--------|-----------|--------|-----------|
|  |  | AU1159 | AU1159301 | AU0938 | AU0938201 |
|  |  | AU1163 | AU1163201 | AU0938 | AU0938202 |
|  |  | AU1163 | AU1163202 | AU0938 | AU0938301 |
|  |  | AU1163 | AU1163303 | AU0939 | AU0939201 |
|  |  | AU1164 | AU1164201 | AU0939 | AU0939202 |
|  |  | AU1164 | AU1164202 | AU0939 | AU0939303 |
|  |  | AU1164 | AU1164302 | AU0943 | AU0943201 |
|  |  | AU1166 | AU1166201 | AU0943 | AU0943202 |
|  |  | AU1166 | AU1166202 | AU0943 | AU0943301 |
|  |  | AU1166 | AU1166301 | AU0948 | AU0948201 |
|  |  | AU1169 | AU1169201 | AU0948 | AU0948202 |
|  |  | AU1169 | AU1169202 | AU0948 | AU0948301 |
|  |  | AU1169 | AU1169301 | AU0952 | AU0952201 |
|  |  | AU1171 | AU1171201 | AU0952 | AU0952202 |
|  |  | AU1171 | AU1171202 | AU0952 | AU0952302 |
|  |  | AU1171 | AU1171301 | AU0953 | AU0953201 |
|  |  | AU1172 | AU1172201 | AU0953 | AU0953202 |
|  |  | AU1172 | AU1172202 | AU0953 | AU0953301 |
|  |  | AU1172 | AU1172301 | AU0959 | AU0959201 |
|  |  | AU1174 | AU1174201 | AU0959 | AU0959202 |
|  |  | AU1174 | AU1174202 | AU0959 | AU0959302 |
|  |  | AU1174 | AU1174301 | AU0962 | AU0962201 |
|  |  | AU1181 | AU1181201 | AU0962 | AU0962202 |
|  |  | AU1181 | AU1181202 | AU0962 | AU0962301 |
|  |  | AU1181 | AU1181301 | AU0972 | AU0972201 |
|  |  | AU1182 | AU1182201 | AU0972 | AU0972202 |
|  |  | AU1182 | AU1182202 | AU0972 | AU0972301 |
|  |  | AU1182 | AU1182301 | AU0973 | AU0973201 |
|  |  | AU1184 | AU1184201 | AU0973 | AU0973202 |
|  |  | AU1184 | AU1184202 | AU0973 | AU0973301 |
|  |  | AU1184 | AU1184302 | AU0979 | AU0979201 |
|  |  | AU1190 | AU1190201 | AU0979 | AU0979202 |
|  |  | AU1190 | AU1190202 | AU0979 | AU0979301 |
|  |  | AU1190 | AU1190301 | AU0981 | AU0981201 |
|  |  | AU1192 | AU1192201 | AU0981 | AU0981202 |
|  |  | AU1192 | AU1192202 | AU0981 | AU0981301 |
|  |  | AU1192 | AU1192301 | AU0993 | AU0993201 |
|  |  | AU1193 | AU1193201 | AU0993 | AU0993202 |
|  |  | AU1193 | AU1193202 | AU0993 | AU0993301 |
|  |  | AU1193 | AU1193302 | AU0995 | AU0995201 |
|  |  | AU1195 | AU1195202 | AU0995 | AU0995202 |
|  |  | AU1195 | AU1195203 | AU0995 | AU0995301 |
|  |  | AU1195 | AU1195303 | AU0997 | AU0997201 |
|  |  | AU1197 | AU1197201 | AU0997 | AU0997202 |
|  |  | AU1197 | AU1197202 | AU0997 | AU0997301 |
|  |  | AU1197 | AU1197301 | AU1001 | AU1001101 |

|  |  |        |           |        |           |
|--|--|--------|-----------|--------|-----------|
|  |  | AU1204 | AU1204201 | AU1001 | AU1001102 |
|  |  | AU1204 | AU1204202 | AU1001 | AU1001201 |
|  |  | AU1204 | AU1204301 | AU1006 | AU1006201 |
|  |  | AU1208 | AU1208201 | AU1006 | AU1006202 |
|  |  | AU1208 | AU1208202 | AU1006 | AU1006301 |
|  |  | AU1208 | AU1208301 | AU1007 | AU1007201 |
|  |  | AU1209 | AU1209201 | AU1007 | AU1007202 |
|  |  | AU1209 | AU1209202 | AU1007 | AU1007302 |
|  |  | AU1209 | AU1209301 | AU1009 | AU1009201 |
|  |  | AU1211 | AU1211201 | AU1009 | AU1009202 |
|  |  | AU1211 | AU1211202 | AU1009 | AU1009301 |
|  |  | AU1211 | AU1211301 | AU1016 | AU1016201 |
|  |  | AU1212 | AU1212201 | AU1016 | AU1016202 |
|  |  | AU1212 | AU1212202 | AU1016 | AU1016302 |
|  |  | AU1212 | AU1212301 | AU1030 | AU1030201 |
|  |  | AU1214 | AU1214201 | AU1030 | AU1030202 |
|  |  | AU1214 | AU1214202 | AU1030 | AU1030302 |
|  |  | AU1214 | AU1214302 | AU1038 | AU1038201 |
|  |  | AU1215 | AU1215201 | AU1038 | AU1038202 |
|  |  | AU1215 | AU1215202 | AU1038 | AU1038301 |
|  |  | AU1215 | AU1215301 | AU1047 | AU1047201 |
|  |  | AU1216 | AU1216201 | AU1047 | AU1047202 |
|  |  | AU1216 | AU1216202 | AU1047 | AU1047301 |
|  |  | AU1216 | AU1216302 | AU1048 | AU1048201 |
|  |  | AU1221 | AU1221201 | AU1048 | AU1048202 |
|  |  | AU1221 | AU1221202 | AU1048 | AU1048301 |
|  |  | AU1221 | AU1221301 | AU1054 | AU1054201 |
|  |  | AU1222 | AU1222211 | AU1054 | AU1054202 |
|  |  | AU1222 | AU1222212 | AU1054 | AU1054301 |
|  |  | AU1222 | AU1222312 | AU1059 | AU1059201 |
|  |  | AU1224 | AU1224201 | AU1059 | AU1059202 |
|  |  | AU1224 | AU1224202 | AU1059 | AU1059302 |
|  |  | AU1224 | AU1224301 | AU1060 | AU1060201 |
|  |  | AU1226 | AU1226201 | AU1060 | AU1060202 |
|  |  | AU1226 | AU1226202 | AU1060 | AU1060301 |
|  |  | AU1226 | AU1226304 | AU1069 | AU1069201 |
|  |  | AU1228 | AU1228201 | AU1069 | AU1069202 |
|  |  | AU1228 | AU1228202 | AU1069 | AU1069301 |
|  |  | AU1228 | AU1228303 | AU1074 | AU1074201 |
|  |  | AU1232 | AU1232201 | AU1074 | AU1074202 |
|  |  | AU1232 | AU1232202 | AU1074 | AU1074301 |
|  |  | AU1232 | AU1232302 | AU1076 | AU1076201 |
|  |  | AU1233 | AU1233201 | AU1076 | AU1076202 |
|  |  | AU1233 | AU1233202 | AU1076 | AU1076303 |
|  |  | AU1233 | AU1233301 | AU1078 | AU1078201 |
|  |  | AU1234 | AU1234201 | AU1078 | AU1078202 |

|  |  |        |           |        |           |
|--|--|--------|-----------|--------|-----------|
|  |  | AU1234 | AU1234202 | AU1078 | AU1078301 |
|  |  | AU1234 | AU1234302 | AU1081 | AU1081201 |
|  |  | AU1243 | AU1243201 | AU1081 | AU1081202 |
|  |  | AU1243 | AU1243202 | AU1081 | AU1081301 |
|  |  | AU1243 | AU1243301 | AU1087 | AU1087201 |
|  |  | AU1244 | AU1244201 | AU1087 | AU1087202 |
|  |  | AU1244 | AU1244202 | AU1087 | AU1087301 |
|  |  | AU1244 | AU1244301 | AU1091 | AU1091201 |
|  |  | AU1249 | AU1249201 | AU1091 | AU1091202 |
|  |  | AU1249 | AU1249202 | AU1091 | AU1091304 |
|  |  | AU1249 | AU1249302 | AU1092 | AU1092201 |
|  |  | AU1251 | AU1251201 | AU1092 | AU1092202 |
|  |  | AU1251 | AU1251202 | AU1092 | AU1092301 |
|  |  | AU1251 | AU1251302 | AU1097 | AU1097201 |
|  |  | AU1252 | AU1252201 | AU1097 | AU1097202 |
|  |  | AU1252 | AU1252202 | AU1097 | AU1097301 |
|  |  | AU1252 | AU1252302 | AU1098 | AU1098201 |
|  |  | AU1255 | AU1255201 | AU1098 | AU1098202 |
|  |  | AU1255 | AU1255202 | AU1098 | AU1098302 |
|  |  | AU1255 | AU1255301 | AU1099 | AU1099201 |
|  |  | AU1261 | AU1261201 | AU1099 | AU1099202 |
|  |  | AU1261 | AU1261202 | AU1099 | AU1099302 |
|  |  | AU1261 | AU1261301 | AU1105 | AU1105201 |
|  |  | AU1266 | AU1266201 | AU1105 | AU1105202 |
|  |  | AU1266 | AU1266202 | AU1105 | AU1105303 |
|  |  | AU1266 | AU1266301 | AU1134 | AU1134201 |
|  |  | AU1267 | AU1267201 | AU1134 | AU1134202 |
|  |  | AU1267 | AU1267202 | AU1134 | AU1134301 |
|  |  | AU1267 | AU1267301 | AU1135 | AU1135101 |
|  |  | AU1270 | AU1270201 | AU1135 | AU1135102 |
|  |  | AU1270 | AU1270202 | AU1135 | AU1135202 |
|  |  | AU1270 | AU1270301 | AU1145 | AU1145201 |
|  |  | AU1272 | AU1272201 | AU1145 | AU1145202 |
|  |  | AU1272 | AU1272202 | AU1145 | AU1145301 |
|  |  | AU1272 | AU1272301 | AU1147 | AU1147201 |
|  |  | AU1273 | AU1273201 | AU1147 | AU1147202 |
|  |  | AU1273 | AU1273203 | AU1147 | AU1147301 |
|  |  | AU1273 | AU1273303 | AU1157 | AU1157201 |
|  |  | AU1275 | AU1275201 | AU1157 | AU1157202 |
|  |  | AU1275 | AU1275202 | AU1157 | AU1157301 |
|  |  | AU1275 | AU1275301 | AU1158 | AU1158201 |
|  |  | AU1276 | AU1276201 | AU1158 | AU1158202 |
|  |  | AU1276 | AU1276202 | AU1158 | AU1158301 |
|  |  | AU1276 | AU1276301 | AU1159 | AU1159201 |
|  |  | AU1277 | AU1277201 | AU1159 | AU1159202 |
|  |  | AU1277 | AU1277202 | AU1159 | AU1159301 |

|  |  |        |           |        |           |
|--|--|--------|-----------|--------|-----------|
|  |  | AU1277 | AU1277302 | AU1169 | AU1169201 |
|  |  | AU1280 | AU1280201 | AU1169 | AU1169202 |
|  |  | AU1280 | AU1280202 | AU1169 | AU1169301 |
|  |  | AU1280 | AU1280301 | AU1171 | AU1171201 |
|  |  | AU1282 | AU1282201 | AU1171 | AU1171202 |
|  |  | AU1282 | AU1282202 | AU1171 | AU1171301 |
|  |  | AU1282 | AU1282301 | AU1172 | AU1172201 |
|  |  | AU1283 | AU1283201 | AU1172 | AU1172202 |
|  |  | AU1283 | AU1283202 | AU1172 | AU1172301 |
|  |  | AU1283 | AU1283301 | AU1182 | AU1182201 |
|  |  | AU1285 | AU1285201 | AU1182 | AU1182202 |
|  |  | AU1285 | AU1285202 | AU1182 | AU1182301 |
|  |  | AU1285 | AU1285301 | AU1190 | AU1190201 |
|  |  | AU1286 | AU1286201 | AU1190 | AU1190202 |
|  |  | AU1286 | AU1286202 | AU1190 | AU1190301 |
|  |  | AU1286 | AU1286301 | AU1192 | AU1192201 |
|  |  | AU1289 | AU1289201 | AU1192 | AU1192202 |
|  |  | AU1289 | AU1289202 | AU1192 | AU1192301 |
|  |  | AU1289 | AU1289301 | AU1193 | AU1193201 |
|  |  | AU1299 | AU1299201 | AU1193 | AU1193202 |
|  |  | AU1299 | AU1299202 | AU1193 | AU1193302 |
|  |  | AU1299 | AU1299301 | AU1197 | AU1197201 |
|  |  | AU1305 | AU1305201 | AU1197 | AU1197202 |
|  |  | AU1305 | AU1305202 | AU1197 | AU1197301 |
|  |  | AU1305 | AU1305302 | AU1204 | AU1204201 |
|  |  | AU1307 | AU1307201 | AU1204 | AU1204202 |
|  |  | AU1307 | AU1307202 | AU1204 | AU1204301 |
|  |  | AU1307 | AU1307302 | AU1208 | AU1208201 |
|  |  | AU1309 | AU1309201 | AU1208 | AU1208202 |
|  |  | AU1309 | AU1309202 | AU1208 | AU1208301 |
|  |  | AU1309 | AU1309301 | AU1209 | AU1209201 |
|  |  | AU1312 | AU1312201 | AU1209 | AU1209202 |
|  |  | AU1312 | AU1312202 | AU1209 | AU1209301 |
|  |  | AU1312 | AU1312301 | AU1211 | AU1211201 |
|  |  | AU1317 | AU1317201 | AU1211 | AU1211202 |
|  |  | AU1317 | AU1317202 | AU1211 | AU1211301 |
|  |  | AU1317 | AU1317303 | AU1214 | AU1214201 |
|  |  | AU1318 | AU1318201 | AU1214 | AU1214202 |
|  |  | AU1318 | AU1318202 | AU1214 | AU1214302 |
|  |  | AU1318 | AU1318301 | AU1221 | AU1221201 |
|  |  | AU1320 | AU1320201 | AU1221 | AU1221202 |
|  |  | AU1320 | AU1320202 | AU1221 | AU1221301 |
|  |  | AU1320 | AU1320301 | AU1222 | AU1222211 |
|  |  | AU1321 | AU1321201 | AU1222 | AU1222212 |
|  |  | AU1321 | AU1321202 | AU1222 | AU1222312 |
|  |  | AU1321 | AU1321301 | AU1228 | AU1228201 |

|  |  |        |           |        |           |
|--|--|--------|-----------|--------|-----------|
|  |  | AU1322 | AU1322201 | AU1228 | AU1228202 |
|  |  | AU1322 | AU1322202 | AU1228 | AU1228303 |
|  |  | AU1322 | AU1322301 | AU1234 | AU1234201 |
|  |  | AU1326 | AU1326201 | AU1234 | AU1234202 |
|  |  | AU1326 | AU1326202 | AU1234 | AU1234302 |
|  |  | AU1326 | AU1326301 | AU1243 | AU1243201 |
|  |  | AU1327 | AU1327201 | AU1243 | AU1243202 |
|  |  | AU1327 | AU1327202 | AU1243 | AU1243301 |
|  |  | AU1327 | AU1327302 | AU1244 | AU1244201 |
|  |  | AU1331 | AU1331202 | AU1244 | AU1244202 |
|  |  | AU1331 | AU1331203 | AU1244 | AU1244301 |
|  |  | AU1331 | AU1331302 | AU1252 | AU1252201 |
|  |  | AU1332 | AU1332201 | AU1252 | AU1252202 |
|  |  | AU1332 | AU1332202 | AU1252 | AU1252302 |
|  |  | AU1332 | AU1332301 | AU1255 | AU1255201 |
|  |  | AU1333 | AU1333201 | AU1255 | AU1255202 |
|  |  | AU1333 | AU1333202 | AU1255 | AU1255301 |
|  |  | AU1333 | AU1333301 | AU1261 | AU1261201 |
|  |  | AU1335 | AU1335201 | AU1261 | AU1261202 |
|  |  | AU1335 | AU1335202 | AU1261 | AU1261301 |
|  |  | AU1335 | AU1335301 | AU1266 | AU1266201 |
|  |  | AU1338 | AU1338201 | AU1266 | AU1266202 |
|  |  | AU1338 | AU1338202 | AU1266 | AU1266301 |
|  |  | AU1338 | AU1338302 | AU1267 | AU1267201 |
|  |  | AU1339 | AU1339201 | AU1267 | AU1267202 |
|  |  | AU1339 | AU1339202 | AU1267 | AU1267301 |
|  |  | AU1339 | AU1339301 | AU1270 | AU1270201 |
|  |  | AU1340 | AU1340201 | AU1270 | AU1270202 |
|  |  | AU1340 | AU1340202 | AU1270 | AU1270301 |
|  |  | AU1340 | AU1340302 | AU1272 | AU1272201 |
|  |  | AU1341 | AU1341201 | AU1272 | AU1272202 |
|  |  | AU1341 | AU1341202 | AU1272 | AU1272301 |
|  |  | AU1341 | AU1341302 | AU1273 | AU1273201 |
|  |  | AU1342 | AU1342201 | AU1273 | AU1273203 |
|  |  | AU1342 | AU1342202 | AU1273 | AU1273303 |
|  |  | AU1342 | AU1342301 | AU1275 | AU1275201 |
|  |  | AU1344 | AU1344201 | AU1275 | AU1275202 |
|  |  | AU1344 | AU1344202 | AU1275 | AU1275301 |
|  |  | AU1344 | AU1344301 | AU1276 | AU1276201 |
|  |  | AU1353 | AU1353201 | AU1276 | AU1276202 |
|  |  | AU1353 | AU1353202 | AU1276 | AU1276301 |
|  |  | AU1353 | AU1353301 | AU1277 | AU1277201 |
|  |  | AU1361 | AU1361201 | AU1277 | AU1277202 |
|  |  | AU1361 | AU1361202 | AU1277 | AU1277302 |
|  |  | AU1361 | AU1361301 | AU1280 | AU1280201 |
|  |  | AU1364 | AU1364201 | AU1280 | AU1280202 |

|  |  |        |           |        |           |
|--|--|--------|-----------|--------|-----------|
|  |  | AU1364 | AU1364202 | AU1280 | AU1280301 |
|  |  | AU1364 | AU1364301 | AU1283 | AU1283201 |
|  |  | AU1368 | AU1368201 | AU1283 | AU1283202 |
|  |  | AU1368 | AU1368202 | AU1283 | AU1283301 |
|  |  | AU1368 | AU1368302 | AU1285 | AU1285201 |
|  |  | AU1370 | AU1370201 | AU1285 | AU1285202 |
|  |  | AU1370 | AU1370202 | AU1285 | AU1285301 |
|  |  | AU1370 | AU1370301 | AU1299 | AU1299201 |
|  |  | AU1376 | AU1376201 | AU1299 | AU1299202 |
|  |  | AU1376 | AU1376202 | AU1299 | AU1299301 |
|  |  | AU1376 | AU1376301 | AU1307 | AU1307201 |
|  |  | AU1378 | AU1378201 | AU1307 | AU1307202 |
|  |  | AU1378 | AU1378202 | AU1307 | AU1307302 |
|  |  | AU1378 | AU1378302 | AU1309 | AU1309201 |
|  |  | AU1387 | AU1387201 | AU1309 | AU1309202 |
|  |  | AU1387 | AU1387202 | AU1309 | AU1309301 |
|  |  | AU1387 | AU1387302 | AU1318 | AU1318201 |
|  |  | AU1390 | AU1390201 | AU1318 | AU1318202 |
|  |  | AU1390 | AU1390202 | AU1318 | AU1318301 |
|  |  | AU1390 | AU1390301 | AU1320 | AU1320201 |
|  |  | AU1391 | AU1391201 | AU1320 | AU1320202 |
|  |  | AU1391 | AU1391202 | AU1320 | AU1320301 |
|  |  | AU1391 | AU1391301 | AU1327 | AU1327201 |
|  |  | AU1392 | AU1392201 | AU1327 | AU1327202 |
|  |  | AU1392 | AU1392202 | AU1327 | AU1327302 |
|  |  | AU1392 | AU1392301 | AU1331 | AU1331202 |
|  |  | AU1393 | AU1393201 | AU1331 | AU1331203 |
|  |  | AU1393 | AU1393202 | AU1331 | AU1331302 |
|  |  | AU1393 | AU1393301 | AU1333 | AU1333201 |
|  |  | AU1394 | AU1394201 | AU1333 | AU1333202 |
|  |  | AU1394 | AU1394202 | AU1333 | AU1333301 |
|  |  | AU1394 | AU1394303 | AU1335 | AU1335201 |
|  |  | AU1396 | AU1396201 | AU1335 | AU1335202 |
|  |  | AU1396 | AU1396202 | AU1335 | AU1335301 |
|  |  | AU1396 | AU1396303 | AU1338 | AU1338201 |
|  |  | AU1397 | AU1397201 | AU1338 | AU1338202 |
|  |  | AU1397 | AU1397202 | AU1338 | AU1338302 |
|  |  | AU1397 | AU1397301 | AU1339 | AU1339201 |
|  |  | AU1406 | AU1406201 | AU1339 | AU1339202 |
|  |  | AU1406 | AU1406202 | AU1339 | AU1339301 |
|  |  | AU1406 | AU1406301 | AU1340 | AU1340201 |
|  |  | AU1407 | AU1407201 | AU1340 | AU1340202 |
|  |  | AU1407 | AU1407202 | AU1340 | AU1340302 |
|  |  | AU1407 | AU1407301 | AU1341 | AU1341201 |
|  |  | AU1409 | AU1409201 | AU1341 | AU1341202 |
|  |  | AU1409 | AU1409202 | AU1341 | AU1341302 |

|  |  |        |           |        |           |
|--|--|--------|-----------|--------|-----------|
|  |  | AU1409 | AU1409301 | AU1342 | AU1342201 |
|  |  | AU1410 | AU1410201 | AU1342 | AU1342202 |
|  |  | AU1410 | AU1410202 | AU1342 | AU1342301 |
|  |  | AU1410 | AU1410304 | AU1344 | AU1344201 |
|  |  | AU1411 | AU1411201 | AU1344 | AU1344202 |
|  |  | AU1411 | AU1411202 | AU1344 | AU1344301 |
|  |  | AU1411 | AU1411301 | AU1353 | AU1353201 |
|  |  | AU1419 | AU1419201 | AU1353 | AU1353202 |
|  |  | AU1419 | AU1419202 | AU1353 | AU1353301 |
|  |  | AU1419 | AU1419302 | AU1361 | AU1361201 |
|  |  | AU1424 | AU1424201 | AU1361 | AU1361202 |
|  |  | AU1424 | AU1424202 | AU1361 | AU1361301 |
|  |  | AU1424 | AU1424302 | AU1364 | AU1364201 |
|  |  | AU1427 | AU1427201 | AU1364 | AU1364202 |
|  |  | AU1427 | AU1427202 | AU1364 | AU1364301 |
|  |  | AU1427 | AU1427302 | AU1370 | AU1370201 |
|  |  | AU1443 | AU1443201 | AU1370 | AU1370202 |
|  |  | AU1443 | AU1443202 | AU1370 | AU1370301 |
|  |  | AU1443 | AU1443302 | AU1376 | AU1376201 |
|  |  | AU1456 | AU1456201 | AU1376 | AU1376202 |
|  |  | AU1456 | AU1456202 | AU1376 | AU1376301 |
|  |  | AU1456 | AU1456302 | AU1378 | AU1378201 |
|  |  | AU1459 | AU1459201 | AU1378 | AU1378202 |
|  |  | AU1459 | AU1459202 | AU1378 | AU1378302 |
|  |  | AU1459 | AU1459301 | AU1387 | AU1387201 |
|  |  | AU1462 | AU1462201 | AU1387 | AU1387202 |
|  |  | AU1462 | AU1462202 | AU1387 | AU1387302 |
|  |  | AU1462 | AU1462302 | AU1392 | AU1392201 |
|  |  | AU1465 | AU1465201 | AU1392 | AU1392202 |
|  |  | AU1465 | AU1465202 | AU1392 | AU1392301 |
|  |  | AU1465 | AU1465302 | AU1393 | AU1393201 |
|  |  | AU1486 | AU1486201 | AU1393 | AU1393202 |
|  |  | AU1486 | AU1486202 | AU1393 | AU1393301 |
|  |  | AU1486 | AU1486301 | AU1394 | AU1394201 |
|  |  | AU1493 | AU1493201 | AU1394 | AU1394202 |
|  |  | AU1493 | AU1493202 | AU1394 | AU1394303 |
|  |  | AU1493 | AU1493301 | AU1396 | AU1396201 |
|  |  | AU1494 | AU1494201 | AU1396 | AU1396202 |
|  |  | AU1494 | AU1494202 | AU1396 | AU1396303 |
|  |  | AU1494 | AU1494301 | AU1397 | AU1397201 |
|  |  | AU1498 | AU1498201 | AU1397 | AU1397202 |
|  |  | AU1498 | AU1498202 | AU1397 | AU1397301 |
|  |  | AU1498 | AU1498302 | AU1407 | AU1407201 |
|  |  | AU1505 | AU1505201 | AU1407 | AU1407202 |
|  |  | AU1505 | AU1505202 | AU1407 | AU1407301 |
|  |  | AU1505 | AU1505302 | AU1409 | AU1409201 |

|  |  |        |           |        |           |
|--|--|--------|-----------|--------|-----------|
|  |  | AU1510 | AU1510201 | AU1409 | AU1409202 |
|  |  | AU1510 | AU1510202 | AU1409 | AU1409301 |
|  |  | AU1510 | AU1510301 | AU1411 | AU1411201 |
|  |  | AU1511 | AU1511201 | AU1411 | AU1411202 |
|  |  | AU1511 | AU1511202 | AU1411 | AU1411301 |
|  |  | AU1511 | AU1511303 | AU1419 | AU1419201 |
|  |  | AU1514 | AU1514201 | AU1419 | AU1419202 |
|  |  | AU1514 | AU1514202 | AU1419 | AU1419302 |
|  |  | AU1514 | AU1514301 | AU1424 | AU1424201 |
|  |  | AU1529 | AU1529201 | AU1424 | AU1424202 |
|  |  | AU1529 | AU1529202 | AU1424 | AU1424302 |
|  |  | AU1529 | AU1529302 | AU1427 | AU1427201 |
|  |  | AU1547 | AU1547201 | AU1427 | AU1427202 |
|  |  | AU1547 | AU1547202 | AU1427 | AU1427302 |
|  |  | AU1547 | AU1547301 | AU1443 | AU1443201 |
|  |  | AU1550 | AU1550201 | AU1443 | AU1443202 |
|  |  | AU1550 | AU1550202 | AU1443 | AU1443302 |
|  |  | AU1550 | AU1550301 | AU1456 | AU1456201 |
|  |  |        |           | AU1456 | AU1456202 |
|  |  |        |           | AU1456 | AU1456302 |
|  |  |        |           | AU1459 | AU1459201 |
|  |  |        |           | AU1459 | AU1459202 |
|  |  |        |           | AU1459 | AU1459301 |
|  |  |        |           | AU1465 | AU1465201 |
|  |  |        |           | AU1465 | AU1465202 |
|  |  |        |           | AU1465 | AU1465302 |
|  |  |        |           | AU1486 | AU1486201 |
|  |  |        |           | AU1486 | AU1486202 |
|  |  |        |           | AU1486 | AU1486301 |
|  |  |        |           | AU1493 | AU1493201 |
|  |  |        |           | AU1493 | AU1493202 |
|  |  |        |           | AU1493 | AU1493301 |
|  |  |        |           | AU1498 | AU1498201 |
|  |  |        |           | AU1498 | AU1498202 |
|  |  |        |           | AU1498 | AU1498302 |
|  |  |        |           | AU1505 | AU1505201 |
|  |  |        |           | AU1505 | AU1505202 |
|  |  |        |           | AU1505 | AU1505302 |
|  |  |        |           | AU1510 | AU1510201 |
|  |  |        |           | AU1510 | AU1510202 |
|  |  |        |           | AU1510 | AU1510301 |
|  |  |        |           | AU1511 | AU1511201 |
|  |  |        |           | AU1511 | AU1511202 |
|  |  |        |           | AU1511 | AU1511303 |
|  |  |        |           | AU1529 | AU1529201 |
|  |  |        |           | AU1529 | AU1529202 |



|  |  |  |  |        |           |
|--|--|--|--|--------|-----------|
|  |  |  |  | AU1529 | AU1529302 |
|  |  |  |  | AU1547 | AU1547201 |
|  |  |  |  | AU1547 | AU1547202 |
|  |  |  |  | AU1547 | AU1547301 |
|  |  |  |  |        |           |
|  |  |  |  |        |           |
|  |  |  |  |        |           |
|  |  |  |  |        |           |

Supplemental Table I

| <b>Affected Individuals</b> |                      | <b>Controls</b>  |                      |
|-----------------------------|----------------------|------------------|----------------------|
| <b>Family ID</b>            | <b>Individual ID</b> | <b>Family ID</b> | <b>Individual ID</b> |
| AU0024                      | AU002403             | AU0015           | AU001504             |
| AU0043                      | AU004304             | AU0017           | AU001705             |
| AU0052                      | AU005214             | AU0022           | AU002203             |
| AU0092                      | AU009203             | AU0024           | AU002404             |
| AU0099                      | AU009904             | AU0029           | AU002904             |
| AU0125                      | AU012503             | AU0033           | AU003305             |
| AU0168                      | AU016803             | AU0034           | AU003403             |
| AU0176                      | AU017606             | AU0037           | AU003703             |
| AU0184                      | AU018404             | AU0041           | AU004103             |
| AU0197                      | AU019703             | AU0043           | AU004303             |
| AU0203                      | AU020306             | AU0051           | AU0051301            |
| AU0206                      | AU020604             | AU0052           | AU005205             |
| AU0207                      | AU020703             | AU0052           | AU0052314            |
| AU0210                      | AU021005             | AU0055           | AU005503             |
| AU0273                      | AU027304             | AU0056           | AU005605             |
| AU0277                      | AU027704             | AU0063           | AU006303             |
| AU0316                      | AU0316301            | AU0066           | AU006603             |
| AU0327                      | AU032707             | AU0075           | AU007505             |
| AU0346                      | AU034604             | AU0076           | AU007603             |
| AU0356                      | AU035603             | AU0081           | AU008105             |
| AU0358                      | AU035810             | AU0084           | AU008405             |
| AU0378                      | AU037804             | AU0085           | AU008503             |
| AU0382                      | AU038204             | AU0089           | AU008905             |
| AU0412                      | AU0412303            | AU0092           | AU009204             |
| AU0453                      | AU045304             | AU0102           | AU010212             |
| AU0461                      | AU046103             | AU0108           | AU010805             |
| AU0465                      | AU046503             | AU0109           | AU010905             |
| AU0469                      | AU046904             | AU0110           | AU011001             |
| AU0481                      | AU0481312            | AU0111           | AU011104             |
| AU0507                      | AU050703             | AU0115           | AU011503             |
| AU0548                      | AU054804             | AU0117           | AU011703             |
| AU0549                      | AU0549302            | AU0122           | AU012203             |
| AU0566                      | AU056603             | AU0128           | AU012805             |
| AU0567                      | AU056705             | AU0132           | AU013205             |
| AU0597                      | AU0597302            | AU0137           | AU013703             |
| AU0614                      | AU0614311            | AU0140           | AU014003             |
| AU0625                      | AU062506             | AU0145           | AU014503             |
| AU0626                      | AU062603             | AU0148           | AU014804             |
| AU0633                      | AU063303             | AU0149           | AU014903             |
| AU0638                      | AU0638301            | AU0150           | AU015005             |
| AU0654                      | AU065404             | AU0154           | AU0154301            |
| AU0662                      | AU066204             | AU0161           | AU016105             |
| AU0675                      | AU0675302            | AU0162           | AU016203             |
| AU0676                      | AU067603             | AU0165           | AU016503             |
| AU0682                      | AU068204             | AU0167           | AU016703             |

|        |           |        |           |
|--------|-----------|--------|-----------|
| AU0683 | AU068304  | AU0168 | AU016804  |
| AU0693 | AU069303  | AU0171 | AU017105  |
| AU0698 | AU069807  | AU0172 | AU0172301 |
| AU0700 | AU070008  | AU0173 | AU017303  |
| AU0714 | AU0714301 | AU0175 | AU017503  |
| AU0717 | AU071704  | AU0176 | AU017603  |
| AU0746 | AU074604  | AU0177 | AU017705  |
| AU0767 | AU076704  | AU0179 | AU017903  |
| AU0780 | AU0780301 | AU0180 | AU018002  |
| AU0781 | AU078104  | AU0186 | AU018603  |
| AU0798 | AU079804  | AU0188 | AU018805  |
| AU0803 | AU0803301 | AU0190 | AU019005  |
| AU0827 | AU0827301 | AU0192 | AU0192302 |
| AU0831 | AU083103  | AU0194 | AU019403  |
| AU0833 | AU0833301 | AU0196 | AU019603  |
| AU0836 | AU083603  | AU0199 | AU019903  |
| AU0839 | AU0839301 | AU0200 | AU020005  |
| AU0871 | AU0871302 | AU0203 | AU020303  |
| AU0903 | AU0903301 | AU0206 | AU020603  |
| AU0906 | AU0906302 | AU0215 | AU021508  |
| AU0915 | AU0915301 | AU0217 | AU021703  |
| AU0916 | AU0916301 | AU0227 | AU022701  |
| AU0922 | AU0922301 | AU0230 | AU023002  |
| AU0923 | AU0923301 | AU0233 | AU023305  |
| AU0924 | AU0924301 | AU0235 | AU023503  |
| AU0931 | AU0931306 | AU0236 | AU023603  |
| AU0932 | AU0932313 | AU0240 | AU024005  |
| AU0933 | AU0933301 | AU0241 | AU024103  |
| AU0934 | AU0934302 | AU0250 | AU025003  |
| AU0938 | AU0938301 | AU0255 | AU025505  |
| AU0939 | AU0939303 | AU0262 | AU026205  |
| AU0941 | AU0941301 | AU0264 | AU026403  |
| AU0943 | AU0943302 | AU0273 | AU027303  |
| AU0946 | AU0946302 | AU0275 | AU027503  |
| AU0948 | AU0948301 | AU0276 | AU027603  |
| AU0951 | AU0951301 | AU0282 | AU028205  |
| AU0952 | AU0952302 | AU0285 | AU028506  |
| AU0953 | AU0953301 | AU0289 | AU028904  |
| AU0959 | AU0959302 | AU0301 | AU030105  |
| AU0962 | AU0962301 | AU0304 | AU0304303 |
| AU0965 | AU0965301 | AU0305 | AU030505  |
| AU0971 | AU0971301 | AU0308 | AU030803  |
| AU0972 | AU0972301 | AU0316 | AU0316304 |
| AU0973 | AU0973301 | AU0325 | AU032503  |
| AU0974 | AU0974302 | AU0327 | AU032703  |
| AU0976 | AU0976301 | AU0328 | AU032803  |
| AU0979 | AU0979301 | AU0336 | AU033603  |
| AU0980 | AU0980302 | AU0346 | AU034605  |

|        |           |        |           |
|--------|-----------|--------|-----------|
| AU0994 | AU0994301 | AU0352 | AU035207  |
| AU0995 | AU0995301 | AU0358 | AU035811  |
| AU0997 | AU0997301 | AU0379 | AU037903  |
| AU1000 | AU1000303 | AU0380 | AU038003  |
| AU1001 | AU1001201 | AU0385 | AU038505  |
| AU1002 | AU1002201 | AU0386 | AU038606  |
| AU1016 | AU1016302 | AU0387 | AU038704  |
| AU1030 | AU1030302 | AU0388 | AU038803  |
| AU1039 | AU1039302 | AU0419 | AU041903  |
| AU1047 | AU1047301 | AU0423 | AU042305  |
| AU1048 | AU1048301 | AU0427 | AU042703  |
| AU1054 | AU1054301 | AU0432 | AU043204  |
| AU1065 | AU1065302 | AU0438 | AU043805  |
| AU1074 | AU1074301 | AU0450 | AU045011  |
| AU1075 | AU1075301 | AU0453 | AU045303  |
| AU1094 | AU1094301 | AU0455 | AU045505  |
| AU1097 | AU1097302 | AU0459 | AU045904  |
| AU1098 | AU1098302 | AU0461 | AU046104  |
| AU1102 | AU1102302 | AU0465 | AU046505  |
| AU1105 | AU1105303 | AU0469 | AU046903  |
| AU1134 | AU1134301 | AU0481 | AU0481212 |
| AU1145 | AU1145301 | AU0482 | AU048203  |
| AU1147 | AU1147301 | AU0501 | AU050105  |
| AU1157 | AU1157301 | AU0504 | AU050404  |
| AU1164 | AU1164302 | AU0509 | AU050903  |
| AU1165 | AU1165302 | AU0520 | AU052005  |
| AU1166 | AU1166301 | AU0533 | AU053304  |
| AU1171 | AU1171301 | AU0548 | AU054803  |
| AU1172 | AU1172301 | AU0550 | AU055003  |
| AU1174 | AU1174301 | AU0551 | AU055103  |
| AU1179 | AU1179301 | AU0555 | AU055505  |
| AU1180 | AU1180301 | AU0563 | AU056304  |
| AU1182 | AU1182302 | AU0565 | AU056504  |
| AU1192 | AU1192301 | AU0567 | AU056704  |
| AU1193 | AU1193303 | AU0579 | AU057903  |
| AU1197 | AU1197301 | AU0593 | AU059303  |
| AU1204 | AU1204302 | AU0597 | AU0597301 |
| AU1209 | AU1209301 | AU0598 | AU059805  |
| AU1212 | AU1212301 | AU0600 | AU060003  |
| AU1213 | AU1213302 | AU0603 | AU060304  |
| AU1214 | AU1214303 | AU0614 | AU0614212 |
| AU1216 | AU1216302 | AU0618 | AU061803  |
| AU1221 | AU1221301 | AU0620 | AU062005  |
| AU1224 | AU1224301 | AU0625 | AU062505  |
| AU1231 | AU1231301 | AU0629 | AU062903  |
| AU1232 | AU1232302 | AU0630 | AU063003  |
| AU1233 | AU1233302 | AU0636 | AU0636303 |
| AU1242 | AU1242303 | AU0641 | AU064103  |

|        |           |        |           |
|--------|-----------|--------|-----------|
| AU1244 | AU1244303 | AU0651 | AU065103  |
| AU1252 | AU1252302 | AU0653 | AU065303  |
| AU1255 | AU1255302 | AU0654 | AU065403  |
| AU1260 | AU1260301 | AU0656 | AU065603  |
| AU1267 | AU1267301 | AU0658 | AU065803  |
| AU1270 | AU1270301 | AU0662 | AU066203  |
| AU1272 | AU1272301 | AU0668 | AU066805  |
| AU1276 | AU1276301 | AU0672 | AU067204  |
| AU1277 | AU1277302 | AU0676 | AU067605  |
| AU1282 | AU1282301 | AU0677 | AU067704  |
| AU1283 | AU1283301 | AU0678 | AU067806  |
| AU1286 | AU1286301 | AU0680 | AU068003  |
| AU1289 | AU1289302 | AU0684 | AU068403  |
| AU1299 | AU1299301 | AU0685 | AU068503  |
| AU1305 | AU1305302 | AU0686 | AU068603  |
| AU1307 | AU1307302 | AU0688 | AU068805  |
| AU1317 | AU1317303 | AU0689 | AU068904  |
| AU1318 | AU1318303 | AU0691 | AU0691302 |
| AU1320 | AU1320302 | AU0692 | AU0692302 |
| AU1321 | AU1321301 | AU0694 | AU069403  |
| AU1322 | AU1322301 | AU0695 | AU069505  |
| AU1326 | AU1326301 | AU0696 | AU069606  |
| AU1327 | AU1327302 | AU0698 | AU069808  |
| AU1333 | AU1333301 | AU0700 | AU070006  |
| AU1338 | AU1338302 | AU0707 | AU070702  |
| AU1339 | AU1339301 | AU0708 | AU070809  |
| AU1340 | AU1340303 | AU0709 | AU070904  |
| AU1341 | AU1341302 | AU0720 | AU072003  |
| AU1342 | AU1342301 | AU0725 | AU072503  |
| AU1344 | AU1344301 | AU0729 | AU072903  |
| AU1353 | AU1353302 | AU0730 | AU073004  |
| AU1362 | AU1362301 | AU0733 | AU073304  |
| AU1364 | AU1364301 | AU0742 | AU074205  |
| AU1368 | AU1368302 | AU0745 | AU0745201 |
| AU1373 | AU1373303 | AU0749 | AU0749301 |
| AU1376 | AU1376301 | AU0752 | AU075204  |
| AU1378 | AU1378302 | AU0755 | AU075504  |
| AU1390 | AU1390302 | AU0767 | AU076703  |
| AU1391 | AU1391302 | AU0768 | AU076807  |
| AU1392 | AU1392301 | AU0771 | AU077103  |
| AU1393 | AU1393306 | AU0772 | AU077203  |
| AU1394 | AU1394303 | AU0773 | AU077305  |
| AU1397 | AU1397301 | AU0777 | AU077703  |
| AU1407 | AU1407301 | AU0783 | AU078303  |
| AU1411 | AU1411301 | AU0785 | AU078504  |
| AU1419 | AU1419302 | AU0786 | AU0786301 |
| AU1424 | AU1424302 | AU0788 | AU078803  |
| AU1459 | AU1459301 | AU0792 | AU079203  |

|  |        |           |
|--|--------|-----------|
|  | AU0796 | AU079603  |
|  | AU0799 | AU079903  |
|  | AU0806 | AU0806303 |
|  | AU0808 | AU080805  |
|  | AU0809 | AU080903  |
|  | AU0810 | AU0810301 |
|  | AU0812 | AU081206  |
|  | AU0821 | AU082103  |
|  | AU0823 | AU082305  |
|  | AU0825 | AU082504  |
|  | AU0836 | AU083605  |
|  | AU0841 | AU084103  |
|  | AU0845 | AU084504  |
|  | AU0852 | AU0852301 |
|  | AU0862 | AU0862301 |
|  | AU0863 | AU0863302 |
|  | AU0868 | AU086805  |
|  | AU0871 | AU0871303 |
|  | AU0885 | AU0885301 |
|  | AU0895 | AU0895304 |
|  | AU0899 | AU089905  |
|  | AU0901 | AU0901301 |
|  | AU0903 | AU0903303 |
|  | AU0905 | AU0905302 |
|  | AU0906 | AU0906301 |
|  | AU0912 | AU0912302 |
|  | AU0921 | AU0921301 |
|  | AU0929 | AU0929102 |
|  | AU0931 | AU0931303 |
|  | AU0939 | AU0939301 |
|  | AU0943 | AU0943303 |
|  | AU0959 | AU0959301 |
|  | AU0962 | AU0962302 |
|  | AU0970 | AU0970301 |
|  | AU0971 | AU0971303 |
|  | AU0980 | AU0980301 |
|  | AU0985 | AU0985303 |
|  | AU0991 | AU0991303 |
|  | AU0995 | AU0995302 |
|  | AU1000 | AU1000301 |
|  | AU1001 | AU1001203 |
|  | AU1002 | AU1002202 |
|  | AU1007 | AU1007301 |
|  | AU1010 | AU1010302 |
|  | AU1025 | AU1025302 |
|  | AU1039 | AU1039301 |
|  | AU1043 | AU1043302 |
|  | AU1047 | AU1047201 |

|  |        |           |
|--|--------|-----------|
|  | AU1054 | AU1054303 |
|  | AU1059 | AU1059301 |
|  | AU1065 | AU1065301 |
|  | AU1072 | AU1072202 |
|  | AU1075 | AU1075303 |
|  | AU1076 | AU1076301 |
|  | AU1078 | AU1078201 |
|  | AU1091 | AU1091301 |
|  | AU1098 | AU1098301 |
|  | AU1099 | AU1099301 |
|  | AU1105 | AU1105301 |
|  | AU1135 | AU1135201 |
|  | AU1136 | AU1136201 |
|  | AU1141 | AU1141201 |
|  | AU1145 | AU1145303 |
|  | AU1157 | AU1157302 |
|  | AU1163 | AU1163302 |
|  | AU1165 | AU1165301 |
|  | AU1171 | AU1171303 |
|  | AU1174 | AU1174202 |
|  | AU1181 | AU1181303 |
|  | AU1184 | AU1184301 |
|  | AU1188 | AU1188303 |
|  | AU1190 | AU1190303 |
|  | AU1193 | AU1193301 |
|  | AU1195 | AU1195302 |
|  | AU1198 | AU1198304 |
|  | AU1214 | AU1214301 |
|  | AU1215 | AU1215303 |
|  | AU1216 | AU1216301 |
|  | AU1222 | AU1222311 |
|  | AU1226 | AU1226302 |
|  | AU1228 | AU1228301 |
|  | AU1231 | AU1231303 |
|  | AU1234 | AU1234301 |
|  | AU1244 | AU1244302 |
|  | AU1255 | AU1255303 |
|  | AU1261 | AU1261302 |
|  | AU1267 | AU1267303 |
|  | AU1270 | AU1270303 |
|  | AU1272 | AU1272303 |
|  | AU1273 | AU1273301 |
|  | AU1277 | AU1277301 |
|  | AU1280 | AU1280303 |
|  | AU1282 | AU1282303 |
|  | AU1283 | AU1283302 |
|  | AU1289 | AU1289303 |
|  | AU1305 | AU1305301 |

|  |  |        |           |
|--|--|--------|-----------|
|  |  | AU1307 | AU1307301 |
|  |  | AU1315 | AU1315302 |
|  |  | AU1316 | AU1316302 |
|  |  | AU1317 | AU1317301 |
|  |  | AU1318 | AU1318302 |
|  |  | AU1321 | AU1321303 |
|  |  | AU1327 | AU1327301 |
|  |  | AU1331 | AU1331304 |
|  |  | AU1338 | AU1338301 |
|  |  | AU1340 | AU1340301 |
|  |  | AU1344 | AU1344303 |
|  |  | AU1348 | AU1348302 |
|  |  | AU1364 | AU1364303 |
|  |  | AU1368 | AU1368301 |
|  |  | AU1373 | AU1373302 |
|  |  | AU1378 | AU1378301 |
|  |  | AU1391 | AU1391303 |
|  |  | AU1392 | AU1392303 |
|  |  | AU1393 | AU1393302 |
|  |  | AU1394 | AU1394301 |
|  |  | AU1396 | AU1396301 |
|  |  | AU1397 | AU1397202 |
|  |  | AU1411 | AU1411303 |
|  |  | AU1419 | AU1419301 |
|  |  | AU1424 | AU1424301 |
|  |  | AU1427 | AU1427301 |
|  |  | AU1431 | AU1431303 |
|  |  | AU1443 | AU1443301 |
|  |  | AU1456 | AU1456301 |
|  |  |        | AU1462301 |
|  |  |        | AU1465301 |
|  |  |        | AU1493303 |
|  |  |        | AU1505301 |
|  |  |        | AU1510303 |

Supplemental Table II



| <b>SNP_ID</b> | <b>bp(Ensembl)</b> | <b>Alleles</b> | <b>Marker # in analysis</b> |
|---------------|--------------------|----------------|-----------------------------|
| rs1052502     | 135648258          | G/A            | 1                           |
| rs9494209     | 135648448          | C/G            | 2                           |
| rs2142956     | 135658325          | C/T            | 4                           |
| rs7766656     | 135659294          | A/G            | 5                           |
| rs4896141     | 135663293          | C/G            | 6                           |
| rs4896142     | 135664512          | T/G            | 7                           |
| rs2223802     | 135665277          | C/T            | 8                           |
| rs2207000     | 135665526          | C/T            | 9                           |
| rs6570000     | 135669367          | A/G            | 10                          |
| rs6914831     | 135681337          | C/T            | 11                          |
| rs4896144     | 135688385          | T/C            | 12                          |
| rs17707754    | 135713904          | T/C            | 14                          |
| rs2246943     | 135733209          | A/T            | 15                          |
| rs6570004     | 135748959          | A/T            | 16                          |
| rs17778438    | 135773887          | G/A            | 17                          |
| rs7759971     | 135788577          | C/T            | 20                          |
| rs717120      | 135806822          | T/C            | 21                          |
| rs4526212     | 135846324          | C/A            | 24                          |

Supplemental Table III

A)

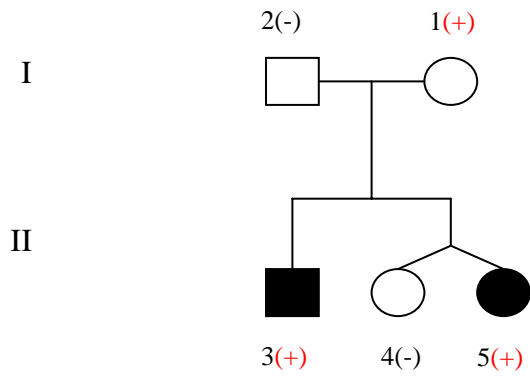

B)

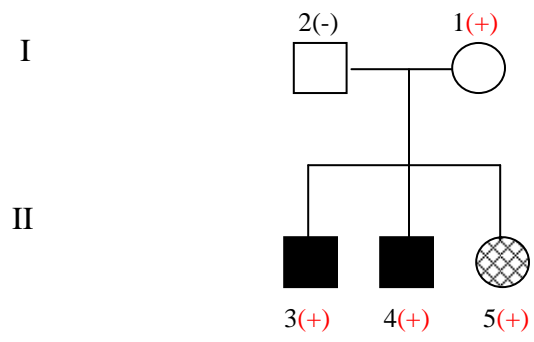

Supplemental Figure 1.
